# Supplementary material for: Intercomparison study and optical asphericity measurements of small ice particles in the CERN CLOUD experiment
Source: Copernicus journal article supplement (doi:10.5194/amt-10-3231-2017), 2017-09-04
Supplement: Supplementary file [file amt-10-3231-2017-supplement.pdf]

Supplement of Atmos. Meas. Tech., 10, 3231–3248, 2017  
<https://doi.org/10.5194/amt-10-3231-2017-supplement>  
© Author(s) 2017. This work is distributed under  
the Creative Commons Attribution 3.0 License.

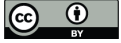

*Supplement of*

## **Intercomparison study and optical asphericity measurements of small ice particles in the CERN CLOUD experiment**

**Leonid Nichman et al.**

*Correspondence to:* Leonid Nichman ([leonid.nichman@manchester.ac.uk](mailto:leonid.nichman@manchester.ac.uk))

The copyright of individual parts of the supplement might differ from the CC BY 3.0 License.

Supplemental material

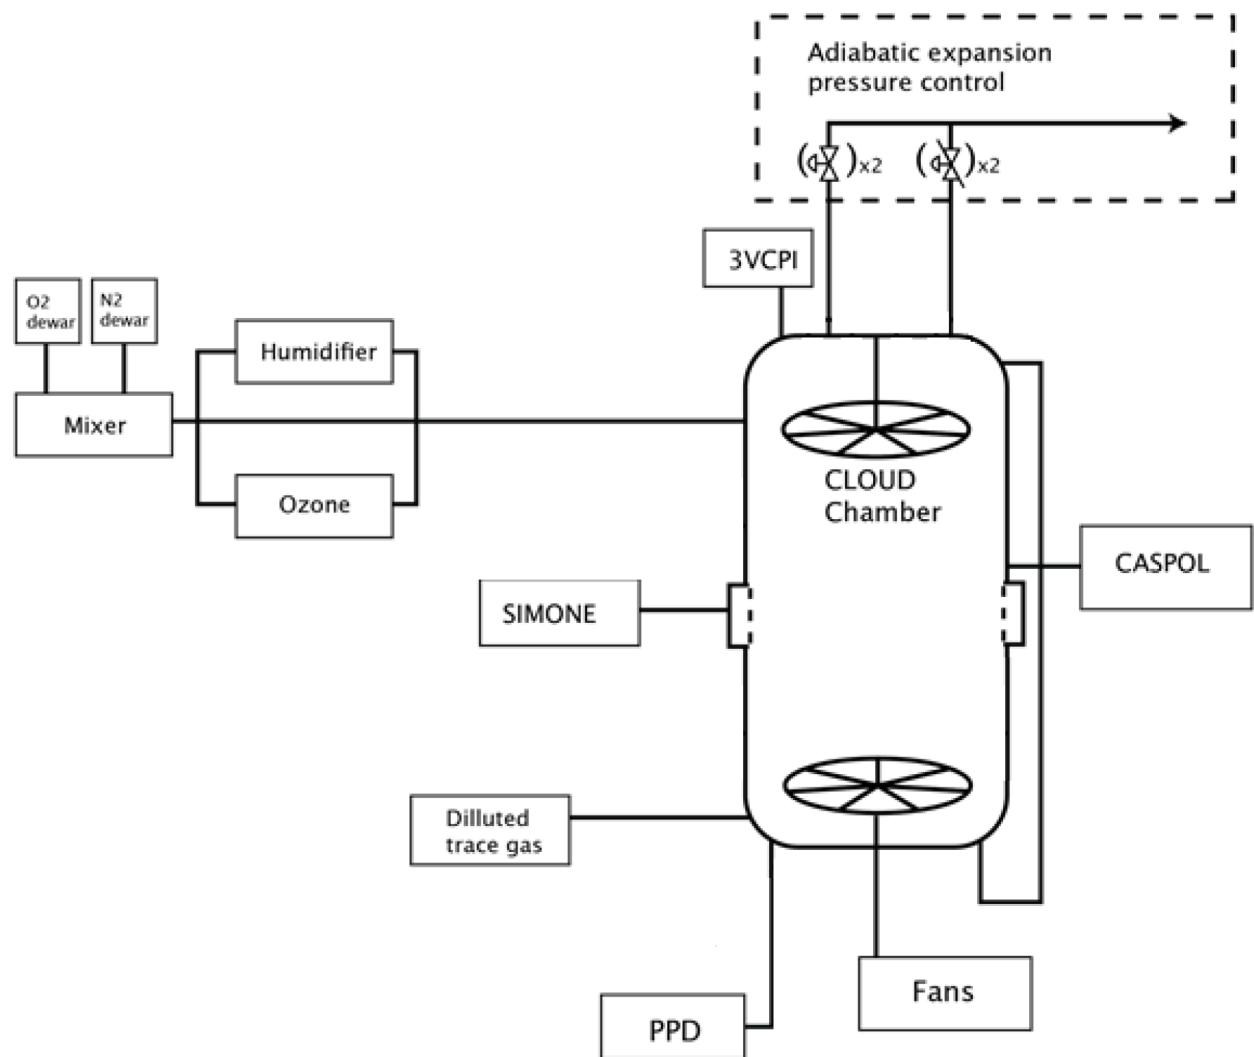

Figure S1. Simplified diagram of the CLOUD chamber and the sampling instruments.

**Table S2. Lower and upper size bin thresholds in CASPOL.**

| Bin number | Bin lower threshold | Bin upper threshold | Bin width |
|------------|---------------------|---------------------|-----------|
| 1          | 0.51                | 0.61                | 0.1       |
| 2          | 0.61                | 0.68                | 0.07      |
| 3          | 0.68                | 0.75                | 0.07      |
| 4          | 0.75                | 0.82                | 0.07      |
| 5          | 0.82                | 0.89                | 0.07      |
| 6          | 0.89                | 0.96                | 0.07      |
| 7          | 0.96                | 1.03                | 0.07      |
| 8          | 1.03                | 1.10                | 0.07      |
| 9          | 1.10                | 1.17                | 0.07      |
| 10         | 1.17                | 1.25                | 0.08      |
| 11         | 1.25                | 1.5                 | 0.25      |
| 12         | 1.5                 | 2                   | 0.5       |
| 13         | 2                   | 2.5                 | 0.5       |
| 14         | 2.5                 | 3                   | 0.5       |
| 15         | 3                   | 3.5                 | 0.5       |
| 16         | 3.5                 | 4                   | 0.5       |
| 17         | 4                   | 5                   | 1         |
| 18         | 5                   | 6.5                 | 1.5       |
| 19         | 6.5                 | 7.2                 | 0.7       |
| 20         | 7.2                 | 7.9                 | 0.7       |
| 21         | 7.9                 | 10.2                | 2.3       |
| 22         | 10.2                | 12.5                | 2.3       |
| 23         | 12.5                | 15                  | 2.5       |
| 24         | 15                  | 20                  | 5         |
| 25         | 20                  | 25                  | 5         |
| 26         | 25                  | 30                  | 5         |
| 27         | 30                  | 35                  | 5         |
| 28         | 35                  | 40                  | 5         |
| 29         | 40                  | 45                  | 5         |
| 30         | 45                  | 50                  | 5         |

**Table S3. Run #1292.01 comparison of R<sup>2</sup> values as a function of mean diameter, concentration, temperature, and column fraction.**

| Time<br>[min]        | 0 – 1                       | 9 – 10.5                    | 1 – 3                       | 12 – 14                     | 0 – 2 | 7 – 10 | 0 – 5               | 12 – 14             |
|----------------------|-----------------------------|-----------------------------|-----------------------------|-----------------------------|-------|--------|---------------------|---------------------|
| parameter            | Diameter↓<br>Concentration↑ | Diameter↓<br>Concentration↓ | Diameter↑<br>Concentration↑ | Diameter↑<br>Concentration↓ | T↓    | T↑     | Column<br>fraction↓ | Column<br>fraction↑ |
| R <sup>2</sup> value | 0.385                       | 0.03                        | 0.023                       | 0.129                       | 0.35  | 0.004  | 0.13                | 0.129               |
